# Supplementary material for: Sinomenine exerts anticonvulsant profile and neuroprotective activity in pentylenetetrazole kindled rats: involvement of inhibition of NLRP1 inflammasome
Source: Springer Nature journal article supplement (doi:10.1186/s12974-018-1199-0), 2018-05-18

**Figure S1**

**A**

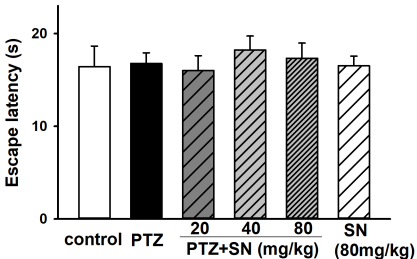

**B**

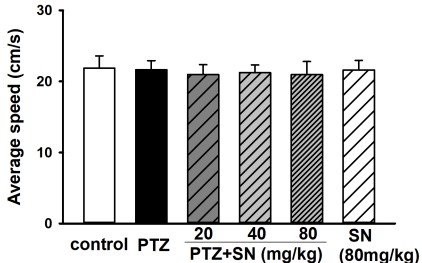

Supplement: MOESM1 [file 15775006]
